# Supplementary material for: Vertical Graphene-Based Printed Electrochemical Biosensor for Simultaneous Detection of Four Alzheimer’s Disease Blood Biomarkers
Source: MDPI journal article supplement (doi:10.3390/bios13080758), 2023-07-25
Supplement: s1 [file s1]

# Vertical Graphene-Based Printed Electrochemical Biosensor for Simultaneous Detection of Four Alzheimer's Disease Blood Biomarkers

Mifang Li<sup>†</sup>, Yu Zeng<sup>†</sup>, Zhen Huang, Lingyan Zhang\* and Yibiao Liu\*

Longgang Central Hospital of Shenzhen, Shenzhen 518116, China

\* Correspondence: 18819818005@163.com (L.Z.); liuyibiao12345@126.com (Y.L.)

<sup>†</sup> These authors contributed equally to this work.

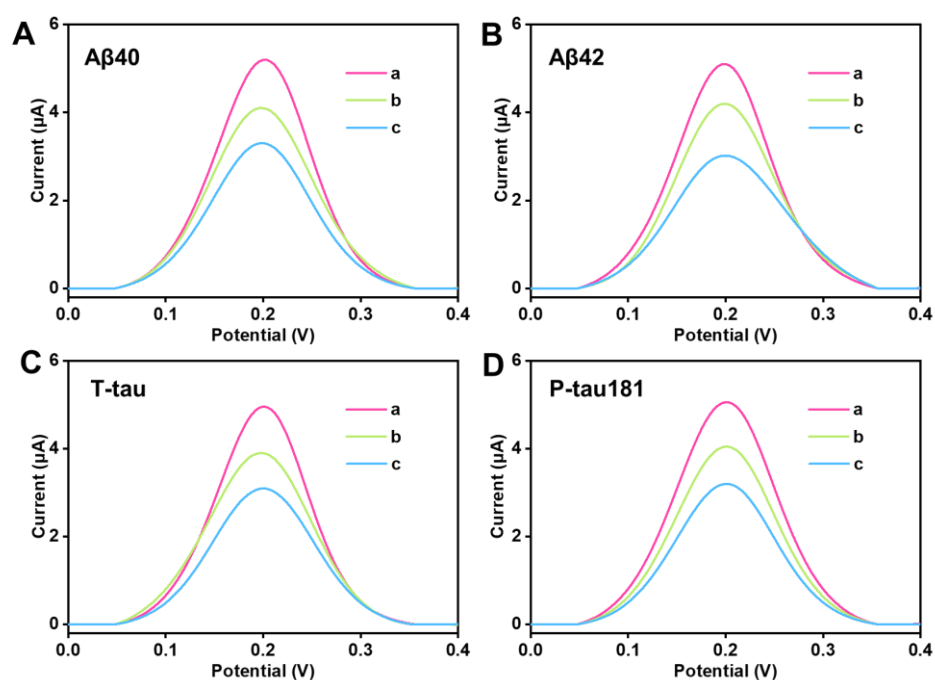

**Figure S1.** The characterization of modification processes of electrode surface. (A)DPV signals of the VG@nanoAu working electrode (curve a) modified with Aβ40 antibody (curve b), Aβ40 antibody + BSA (curve c). (B) DPV signals of the VG@nanoAu working electrode (curve a) modified with antibody of Aβ42 antibody (curve b), Aβ42 antibody + BSA (curve c). (C) DPV signals of the VG@nanoAu working electrode (curve a) modified with T-tau antibody (curve b), T-tau antibody + BSA (curve c). (D)DPV signals of the VG@nanoAu working electrode (curve a) modified with P-tau181 antibody (curve b), P-tau181 antibody + BSA (curve c). The DPVs are carried out in 5 mM [Fe(CN)<sub>6</sub>]<sup>3-</sup>/[Fe(CN)<sub>6</sub>]<sup>4-</sup> solution containing 0.1 M KCl at 0.1 V/s.

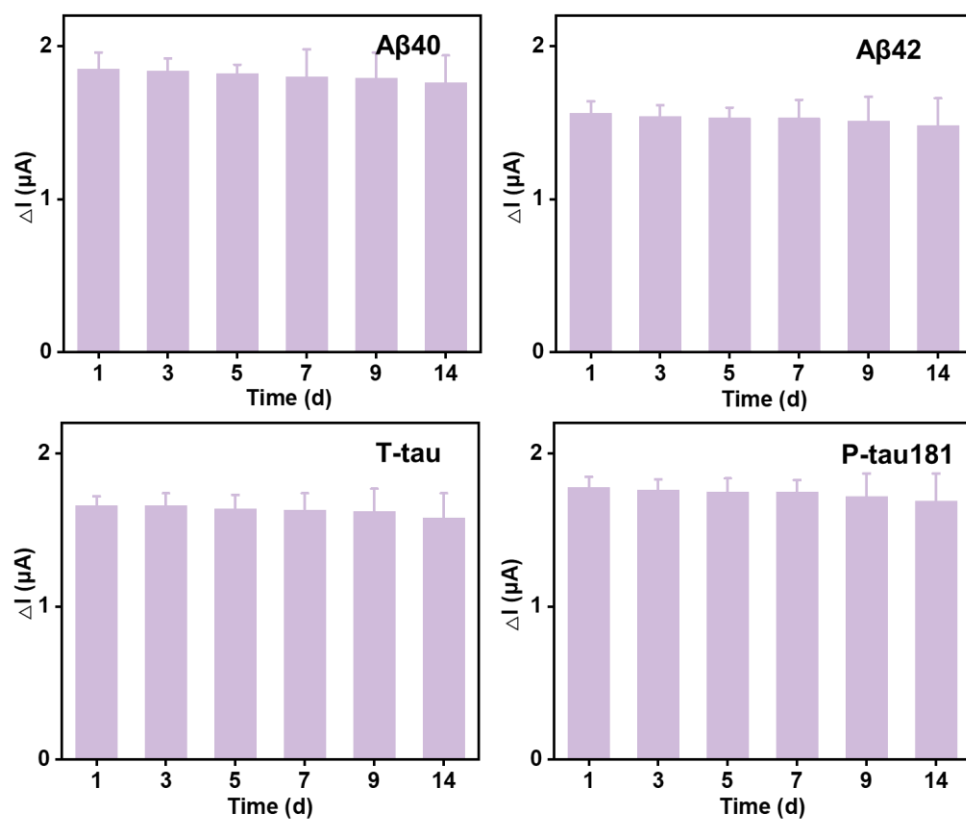

Figure S2. Stability of the printed electrochemical sensor for detecting four AD biomarkers.
